# Supplementary material for: Flooding Length Mediates Fencing and Grazing Effects on Soil Respiration in Meadow Steppe
Source: MDPI journal article supplement (doi:10.3390/plants13050666), 2024-02-28
Supplement: s1 [file s1]

**Table S1** Results of three-way ANOVAs showing the effects of grassland management, flooding conditions, years and their interaction on Rs and its components.

|       | GM     | FC       | Year      | GM×FC | GM×Year | FC×Year | GM×FC×Year |
|-------|--------|----------|-----------|-------|---------|---------|------------|
| Rs    | 3.15   | 23.35*** | 163.75*** | 2.11  | 1.33    | 5.76**  | 2.04       |
| Rh    | 8.36** | 28.76*** | 112.89*** | 4.55* | 3.64*   | 5.30**  | 8.02***    |
| Ra    | 1.75   | 13.22*** | 146.01*** | 4.29* | 6.43**  | 4.67**  | 5.73**     |
| Rh/Rs | 0.06   | 1.45     | 39.79***  | 1.13  | 5.98**  | 0.47    | 2.91*      |

\*, \*\* and \*\*\* represents the statistical significance was at the level of  $p < 0.05$ ,  $0.01$  and  $0.001$ , respectively.

GM, grassland management; FC, flooding condition; Rs, soil respiration; Rh, heterotrophic respiration; Ra, autotrophic respiration.

**Table S2** Exponential equation of soil respiration (Rs), heterotrophic respiration (Rh) and autotrophic respiration (Ra) with soil temperature

| Treatment |     | Equation              | N   | $p$    | R <sup>2</sup> |
|-----------|-----|-----------------------|-----|--------|----------------|
| Fencing   | NF  | Rs=8.95×exp(0.13×ST)  | 172 | <0.001 | 0.38           |
|           |     | Rh=3.62×exp(0.13×ST)  | 172 | <0.001 | 0.31           |
|           |     | Ra=3.16×exp(0.14×ST)  | 172 | <0.001 | 0.26           |
|           | STF | Rs=17.88×exp(0.10×ST) | 172 | <0.001 | 0.26           |
|           |     | Rh=0.10×exp(7.70×ST)  | 172 | <0.001 | 0.25           |
|           |     | Ra=5.88×exp(0.12×ST)  | -   | -      | 0.22           |
|           | LTF | Rs=29.50×exp(0.07×ST) | 172 | <0.001 | 0.25           |
|           |     | Rh=8.27×exp(0.09×ST)  | 172 | <0.001 | 0.38           |
|           |     | Ra=25.22×exp(0.04×ST) | 172 | <0.001 | <0.20          |
|           | NF  | Rs=9.50×exp(0.13×ST)  | 172 | <0.001 | 0.34           |
|           |     | Rh=1.00×exp(0.19×ST)  | -   | -      | 0.54           |
|           |     | Ra=3.79×exp(0.14×ST)  | -   | -      | 0.28           |
| Grazing   | STF | Rs=37.86×exp(0.06×ST) | 172 | <0.001 | <0.20          |
|           |     | Rh=11.83×exp(0.09×ST) | 172 | <0.001 | 0.24           |
|           |     | Ra=27.58×exp(0.05×ST) | 172 | <0.001 | <0.20          |
|           | LTF | Rs=42.01×exp(0.06×ST) | 172 | <0.001 | <0.20          |
|           |     | Rh=14.27×exp(0.07×ST) | 172 | <0.001 | 0.22           |
|           |     | Ra=27.04×exp(0.05×ST) | 172 | <0.001 | <0.20          |

**Table S3** Regression equation of soil respiration (Rs), heterotrophic respiration (Rh) and autotrophic respiration (Ra) with soil water content

| Treatment |    | Equation           | N   | $p$    | R <sup>2</sup> |
|-----------|----|--------------------|-----|--------|----------------|
| Fencing   | NF | Rs=21.72×SWC-29.62 | 172 | <0.001 | 0.4            |

|         |     |                     |     |        |       |
|---------|-----|---------------------|-----|--------|-------|
|         |     | Rh=7.82×SWC+6.23    | 172 | <0.001 | 0.21  |
|         |     | Ra=13.13×SWC−34.49  | 172 | <0.001 | 0.3   |
|         |     | Rs=5.52×SWC−71.69   | 172 | <0.001 | <0.20 |
|         | STF | Rh=2.06×SWC−10.69   | 172 | <0.001 | <0.20 |
|         |     | Ra=4.99×SWC−130.90  | -   | -      | <0.20 |
|         |     | Rs=1.05×SWC+104.30  | -   | -      | <0.20 |
|         | LTF | Rh=−0.02×SWC+81.65  | -   | -      | <0.20 |
|         |     | Ra=1.03×SWC+24.12   | -   | -      | <0.20 |
|         |     | Rs=−4.02×SWC+256.30 | -   | -      | <0.20 |
|         | NF  | Rh=13.25×SWC−28.34  | -   | -      | 0.23  |
|         |     | Ra=13.37×SWC−37.43  | -   | -      | 0.3   |
|         |     | Rs=−0.76×SWC+199.80 | -   | -      | <0.20 |
| Grazing | STF | Rh=1.80×SWC+3.83    | 172 | <0.001 | <0.20 |
|         |     | Ra=0.57×SWC+59.61   | -   | -      | <0.20 |
|         |     | Rs=0.94×SWC+108.1   | -   | -      | <0.20 |
|         | LTF | Rh=0.48×SWC+51.51   | -   | -      | <0.20 |
|         |     | Ra=2.33×SWC−25.29   | 172 | <0.001 | <0.20 |

**Table S4** Linear regression equations between soil respiration (Rs), heterotrophic respiration (Rh) and autotrophic respiration (Ra) and soil temperature and soil water content.

| Treatment |     | Equation                    | N   | <i>p</i> | R <sup>2</sup> | Partial R <sup>2</sup> |      |
|-----------|-----|-----------------------------|-----|----------|----------------|------------------------|------|
|           |     |                             |     |          |                | ST                     | SWC  |
|           |     | Rs=91.07ST−1943.50          | 172 | <0.001   | 0.74           | -                      | -    |
|           | NF  | Rh=37.55ST+27.26SWC−1072.99 | 172 | <0.001   | 0.99           | 0.53                   | 0.47 |
|           |     | Ra=45.68ST+48.70SWC−460.72  | 172 | <0.001   | 0.8            | 0.35                   | 0.58 |
|           |     | Rs=99.18ST−16.66SWC−1353.43 | 172 | <0.001   | 0.64           | 0.51                   | 0.38 |
| Fencing   | STF | Rh=70.77ST−10.35SWC−1080.77 | 172 | <0.001   | 0.99           | 0.68                   | 0.32 |
|           |     | -                           | -   | -        | -              | -                      | -    |
|           |     | Rs=51.45ST−23.70SWC+76.59   | 172 | <0.001   | 0.74           | 0.56                   | 0.12 |
|           | LTF | Rh=12.88ST−13.26SWC+417.13  | 172 | <0.001   | 0.9            | 0.01                   | 0.87 |
|           |     | Ra=9.63ST−7.19SWC+185.57    | 172 | <0.001   | 0.99           | 0.09                   | 0.9  |
|           |     | Rs=85.04ST+12.65SWC−1930.26 | 172 | <0.001   | 0.93           | 0.84                   | 0.14 |
|           | NF  | -                           | -   | -        | -              | -                      | -    |
|           |     | -                           | -   | -        | -              | -                      | -    |
| Grazing   |     | Rs=136.67ST+3361.12         | 172 | <0.001   | 0.64           | -                      | -    |
|           | STF | Rh=73.21ST−9.67SWC+2286.88  | 172 | <0.001   | 0.93           | 0.21                   | 0.76 |
|           |     | Ra=65.25ST+1607.93          | 172 | <0.001   | 0.54           | -                      | -    |
|           | LTF | Rs=102.26ST−3.57SWC+2739.15 | 172 | <0.001   | 0.69           | 0.52                   | 0.38 |

|                            |     |        |      |      |      |
|----------------------------|-----|--------|------|------|------|
| Rh=-2.13SWC+180.50         | 172 | <0.001 | 0.82 | -    | -    |
| Ra=72.13ST-3.05SWC+1935.24 | 172 | <0.001 | 0.82 | 0.51 | 0.43 |

NF, no flooding; STF, short-term flooding; LTF, long-term flooding; ST, soil temperature; SWC, soil water content.

**Table S5** Influencing factors of Rs and its components under different flooding conditions.

| Factors                         | NF    |       |       | STF   |       |       | LTF   |       |       |
|---------------------------------|-------|-------|-------|-------|-------|-------|-------|-------|-------|
|                                 | Rs    | Rh    | Ra    | Rs    | Rh    | Ra    | Rs    | Rh    | Ra    |
| ST                              | 20.32 | 19.95 | 1.04  | 32.42 | 27.99 | 17.72 | 8.53  | 10.6  | 31.36 |
| SWC                             | 1.52  | -     | 6.75  |       | 15.62 | 18.14 | 0.52  | 7.86  | 0.07  |
| EC                              | 8.92  | 2.58  | 15.31 | 3.46  | 1.07  | 3.43  | 3.48  | 2.93  | 1.05  |
| pH                              | 5.45  | 1.19  | 5.09  | 6.31  | 5.19  | 2.2   | 5.29  | 2.94  | 2.32  |
| TC                              | 6.5   | 8.17  | 1.88  | 3.11  | 1.46  | 7.44  | 19.94 | 26.55 | 0.04  |
| TN                              | -     | 0.45  | -     | 0.5   | 0.85  | 1.73  | 4.31  | 4.86  | 0.7   |
| SOC                             | -     | 5.62  | -     | 1.74  | 3.29  | -     | 1.78  | -     | 2.59  |
| NH <sub>4</sub> <sup>+</sup> -N | -     | 1.82  | 27.78 | 3.7   | 4     | 1.82  | 1.72  | 4.75  | 6.32  |
| NO <sub>3</sub> <sup>-</sup> -N | 0.84  | -     | 8.11  | 0.87  | 1.06  | -     | 1.09  | 1.41  | 2.37  |
| MBC                             | 16.95 | 21.69 | 7.93  | 13.03 | 10.69 | 12.9  | 27.86 | 16.2  | 20.85 |
| MBN                             | 22.88 | 8.2   | 28.97 | -     | -     |       | 5.39  | 5.34  | -     |
| BGB                             | 2.47  | 4.45  | -     | 37.15 | 31.63 | 44.25 | 16.35 | 17.49 | 12.96 |
| ANPP                            | 19.19 | 26.83 | 0.65  | -     | -     | -     | 3.78  | -     | 23.01 |

NF, no-flooding; STF, short-term flooding; LTF, long-term flooding; Rs, soil respiration; Rh, heterotrophic respiration; Ra, autotrophic respiration; ST, soil temperature; SWC, soil water content; EC, electrical conductivity; TC, total carbon; TN, total nitrogen; SOC, soil organic; NH<sub>4</sub><sup>+</sup>-N, ammonium nitrogen; NO<sub>3</sub><sup>-</sup>-N, nitrate nitrogen; MBC, microbial biomass carbon; MBN, microbial biomass nitrogen; BGB, belowground biomass; ANPP, aboveground net primary production.
